# Supplementary material for: Metabolomic anatomy of an animal model revealing homeostatic imbalances in dyslipidaemia
Source: Royal Society of Chemistry journal article supplement (doi:10.1039/c0mb00141d), 2011-01-24
Supplement: c0mb00141d-ts1.pdf [file c0mb00141d-ts1.pdf]

Supplementary Material (ESI) for Molecular BioSystems  
This journal is (c) The Royal Society of Chemistry, 2011

| ID                    | Annotation                    | Mode | m/z    | <sup>2</sup> RelArea ± SD (×1000) |                |                | DL/HC |                      | DL/DLS |                      |
|-----------------------|-------------------------------|------|--------|-----------------------------------|----------------|----------------|-------|----------------------|--------|----------------------|
|                       |                               |      |        | Plasma                            |                |                | Ratio | <sup>3</sup> p-value | Ratio  | <sup>3</sup> p-value |
|                       |                               |      |        | HC                                | DL             | DLS            |       |                      |        |                      |
| <i>Fatty acid</i>     |                               |      |        |                                   |                |                |       |                      |        |                      |
| AN_231                | FA(12:1)                      | A    | 197.16 | 0.8 ± 0.3                         | 0.7 ± 0.2      | 0.8 ± 0.1      | 0.9   | 0.73                 | 0.9    | 0.59                 |
| AN_232                | FA(12:0)                      | A    | 199.17 | 1.4 ± 0.4                         | 2.4 ± 0.2      | 1.3 ± 0.4      | 1.8   | 0.02                 | 1.9    | 0.013                |
| AN_233                | FA(13:0)                      | A    | 213.19 | N.D.                              | 0.4 ± 0.2      | 0.3            | N.A.  | N.A.                 | 1.2    | N.A.                 |
| AN_234                | FA(14:3)                      | A    | 221.16 | 3.1 ± 0.8                         | 4.5 ± 1.1      | 3.3 ± 0.4      | 1.5   | 0.15                 | 1.3    | 0.20                 |
| AN_235                | FA(14:2)                      | A    | 223.17 | 0.9 ± 0.1                         | 1.0 ± 0.3      | 1.0 ± 0.4      | 1.1   | 0.55                 | 1.0    | 0.97                 |
| AN_236                | FA(14:1)                      | A    | 225.19 | 0.7 ± 0.1                         | 1.2 ± 0.6      | 0.8 ± 0.2      | 1.8   | 0.28                 | 1.5    | 0.39                 |
| AN_237                | FA(14:1)                      | A    | 225.19 | 0.7 ± 0.3                         | 3.2 ± 1.1      | 1.4 ± 0.6      | 4.4   | 0.05                 | 2.3    | 0.08                 |
| AN_238                | FA(14:0)/Myristic acid        | A    | 227.20 | 21.9 ± 7.0                        | 44.0 ± 7.8     | 23.3 ± 3.8     | 2.0   | 0.02                 | 1.9    | 0.03                 |
| AN_239                | FA(15:1)                      | A    | 239.20 | 1.6 ± 1.9                         | 2.8 ± 0.7      | 1.1 ± 0.2      | 1.8   | 0.38                 | 2.6    | 0.03                 |
| AN_240                | FA(15:1)                      | A    | 239.20 | 2.8 ± 0.6                         | 6.7 ± 0.8      | 3.4 ± 1.0      | 2.4   | 3.2E-03              | 2.0    | 0.011                |
| AN_241                | FA(15:0)/Pentadecanoic acid   | A    | 241.22 | 6.7 ± 0.4                         | 10.0 ± 1.1     | 7.4 ± 0.9      | 1.5   | 0.02                 | 1.4    | 0.04                 |
| AN_242                | 3-Hydroxytetradecanoic acid   | A    | 243.20 | 0.4 ± 0.2                         | 0.9 ± 0.2      | 0.6 ± 0.1      | 2.3   | 0.10                 | 1.6    | 0.13                 |
| AN_243                | FA(16:3)                      | A    | 249.19 | 0.5 ± 0.1                         | 1.4 ± 0.2      | 0.7 ± 0.2      | 3.0   | 8.2E-03              | 2.0    | 0.02                 |
| AN_244                | FA(16:2)                      | A    | 251.20 | 2.1 ± 0.4                         | 5.1 ± 0.3      | 3.4 ± 1.0      | 2.5   | 1.1E-03              | 1.5    | 0.09                 |
| AN_245                | FA(16:1)                      | A    | 253.22 | 79.5 ± 25.4                       | 266.2 ± 68.3   | 129.7 ± 45.2   | 3.3   | 0.03                 | 2.1    | 0.05                 |
| AN_246                | FA(16:0)                      | A    | 255.23 | 794.5 ± 56.0                      | 1295.7 ± 140.2 | 962.2 ± 215.2  | 1.6   | 0.015                | 1.3    | 0.10                 |
| AN_247                | FA(17:3)                      | A    | 263.20 | N.D.                              | 0.9 ± 0.1      | 0.5 ± 0.2      | N.A.  | N.A.                 | 1.7    | 0.25                 |
| AN_248                | FA(17:2)                      | A    | 265.22 | 0.9 ± 0.2                         | 2.8 ± 0.4      | 1.5 ± 0.6      | 3.0   | 3.8E-03              | 2.0    | 0.04                 |
| AN_249                | FA(17:1)                      | A    | 267.23 | 17.6 ± 5.4                        | 34.2 ± 4.5     | 20.8 ± 7.2     | 1.9   | 0.02                 | 1.6    | 0.06                 |
| AN_250                | FA(17:0)                      | A    | 269.25 | 37.6 ± 1.4                        | 57.3 ± 4.0     | 46.8 ± 6.4     | 1.5   | 8.2E-03              | 1.2    | 0.09                 |
| AN_251                | FA(18:4)                      | A    | 275.20 | 0.6 ± 0.1                         | 1.8 ± 0.1      | 0.9 ± 0.3      | 3.1   | 3.5E-04              | 2.0    | 0.03                 |
| AN_252                | FA(18:3)                      | A    | 277.22 | 300.0 ± 77.6                      | 800.4 ± 82.0   | 401.9 ± 156.9  | 2.7   | 1.6E-03              | 2.0    | 0.03                 |
| AN_253                | FA(18:2)                      | A    | 279.23 | 1547.4 ± 217.6                    | 2977.0 ± 181.8 | 2024.4 ± 546.8 | 1.9   | 1.1E-03              | 1.5    | 0.08                 |
| AN_254                | FA(18:1)/Oleic acid           | A    | 281.25 | 1399.2 ± 285.3                    | 2545.1 ± 367.2 | 1778.6 ± 507.4 | 1.8   | 0.015                | 1.4    | 0.11                 |
| AN_255                | FA(18:0)/Stearic acid         | A    | 283.27 | 481.6 ± 81.2                      | 710.9 ± 85.6   | 566.6 ± 114.1  | 1.5   | 0.03                 | 1.3    | 0.16                 |
| AN_256                | Methyl palmitic acid          | C    | 288.29 | 5.0 ± 0.9                         | 6.2 ± 1.8      | 6.0 ± 1.8      | 1.3   | 0.36                 | 1.0    | 0.89                 |
| AN_257                | FA(19:2)                      | A    | 293.25 | 0.7 ± 0.2                         | 1.4 ± 0.1      | 0.9 ± 0.1      | 2.0   | 0.02                 | 1.7    | 0.007                |
| AN_258                | FA(19:1)                      | A    | 295.27 | 10.6 ± 2.0                        | 16.3 ± 2.6     | 11.7 ± 1.9     | 1.5   | 0.04                 | 1.4    | 0.07                 |
| AN_259                | FA(19:0)                      | A    | 297.28 | 3.8 ± 0.6                         | 6.6 ± 0.9      | 4.7 ± 0.7      | 1.8   | 0.014                | 1.4    | 0.05                 |
| AN_260                | FA(20:5)                      | A    | 301.22 | 2.9 ± 0.7                         | 6.7 ± 0.8      | 4.0 ± 0.9      | 2.3   | 3.2E-03              | 1.7    | 0.02                 |
| AN_261                | FA(20:4)/Arachidonic acid     | A    | 303.23 | 43.7 ± 6.7                        | 87.3 ± 5.0     | 59.4 ± 14.2    | 2.0   | 1.2E-03              | 1.5    | 0.06                 |
| AN_262                | FA(20:3)                      | A    | 305.25 | 1.8 ± 0.3                         | 4.1 ± 0.3      | 3.0 ± 0.8      | 2.3   | 5.3E-04              | 1.4    | 0.12                 |
| AN_263                | FA(20:3)                      | A    | 305.25 | 8.0 ± 1.8                         | 16.4 ± 1.3     | 10.7 ± 2.1     | 2.0   | 3.9E-03              | 1.5    | 0.02                 |
| AN_264                | FA(20:2)                      | A    | 307.27 | 13.4 ± 2.5                        | 24.6 ± 2.7     | 16.3 ± 1.9     | 1.8   | 6.5E-03              | 1.5    | 0.02                 |
| AN_265                | FA(20:1)                      | A    | 309.28 | 13.5 ± 1.4                        | 23.9 ± 1.5     | 18.4 ± 3.6     | 1.8   | 8.4E-04              | 1.3    | 0.11                 |
| AN_266                | FA(20:0)                      | A    | 311.30 | 2.7 ± 0.4                         | 6.4 ± 1.1      | 4.4 ± 1.1      | 2.3   | 0.02                 | 1.5    | 0.09                 |
| AN_267                | FA(21:0)                      | A    | 325.31 | 0.3                               | 0.9 ± 0.2      | 0.6 ± 0.1      | 3.4   | N.A.                 | 1.5    | 0.08                 |
| AN_268                | FA(22:5)                      | A    | 329.25 | 13.5 ± 2.2                        | 26.7 ± 2.9     | 21.7 ± 2.4     | 2.0   | 4.1E-03              | 1.2    | 0.09                 |
| AN_269                | FA(22:4)                      | A    | 331.27 | 8.7 ± 2.0                         | 16.1 ± 1.2     | 12.5 ± 1.8     | 1.8   | 9.6E-03              | 1.3    | 0.05                 |
| AN_270                | FA(22:3)                      | A    | 333.28 | 0.6                               | 1.1 ± 0.2      | 1.1 ± 0.2      | 1.8   | N.A.                 | 1.1    | 0.64                 |
| AN_271                | FA(22:2)                      | A    | 335.30 | 0.5 ± 0.0                         | 1.1 ± 0.2      | 0.9 ± 0.3      | 2.3   | 0.014                | 1.2    | 0.38                 |
| AN_272                | FA(22:1)/Erucic acid          | A    | 337.31 | 1.4 ± 0.4                         | 3.0 ± 0.6      | 2.1 ± 0.6      | 2.2   | 0.02                 | 1.4    | 0.12                 |
| AN_273                | FA(22:0)                      | A    | 339.33 | 1.1 ± 0.1                         | 8.8 ± 1.4      | 5.2 ± 1.6      | 7.9   | 9.9E-03              | 1.7    | 0.04                 |
| AN_274                | Ethyl arachidonic acid        | C    | 350.31 | 15.8 ± 3.0                        | 22.7 ± 1.2     | 21.3 ± 4.7     | 1.4   | 0.04                 | 1.1    | 0.66                 |
| AN_275                | FA(23:0)                      | A    | 353.34 | 0.7 ± 0.1                         | 1.4 ± 0.5      | 1.0 ± 0.3      | 1.9   | 0.13                 | 1.5    | 0.26                 |
| AN_276                | FA(24:5)                      | A    | 357.28 | 0.5 ± 0.2                         | 1.1 ± 0.1      | 0.9            | 2.2   | 0.07                 | 1.2    | N.A.                 |
| AN_277                | FA(24:4)                      | A    | 359.30 | 0.4 ± 0.0                         | 0.7 ± 0.1      | 0.5 ± 0.1      | 1.8   | 0.02                 | 1.4    | 0.03                 |
| AN_278                | FA(24:2)                      | A    | 363.33 | 0.5 ± 0.0                         | 1.5 ± 0.1      | 1.3 ± 0.2      | 2.8   | 3.2E-03              | 1.2    | 0.14                 |
| AN_279                | FA(24:1)                      | A    | 365.34 | 2.5 ± 0.3                         | 7.9 ± 3.1      | 6.8 ± 2.5      | 3.2   | 0.09                 | 1.2    | 0.67                 |
| AN_280                | FA(24:0)/n-Tetracosanoic acid | A    | 367.36 | 1.7 ± 0.4                         | 3.7 ± 0.9      | 2.0 ± 0.5      | 2.1   | 0.04                 | 1.9    | 0.06                 |
| AN_281                | FA(25:3)                      | A    | 375.33 | 0.6 ± 0.3                         | 7.1 ± 2.5      | 2.2 ± 0.6      | 12.0  | 0.04                 | 3.3    | 0.07                 |
| AN_282                | FA(25:0)                      | A    | 381.38 | 0.5 ± 0.1                         | 0.9 ± 0.2      | 0.4 ± 0.0      | 1.6   | 0.08                 | 2.3    | 0.05                 |
| AN_283                | FA(26:2)                      | A    | 391.36 | 0.2                               | 2.5 ± 0.5      | 1.2 ± 0.1      | 10.5  | N.A.                 | 2.1    | 0.05                 |
| AN_284                | FA(26:0)                      | A    | 395.39 | 0.5 ± 0.1                         | 0.9 ± 0.2      | 0.4 ± 0.1      | 1.8   | 0.07                 | 2.1    | N.A.                 |
| <i>Acyl-carnitine</i> |                               |      |        |                                   |                |                |       |                      |        |                      |
| AN_285                | AC(13:1)                      | C    | 356.28 | 1.0 ± 0.3                         | N.D.           | 1.0 ± 0.4      | N.A.  | N.A.                 | N.A.   | N.A.                 |
| AN_286                | AC(14:3)                      | C    | 366.26 | 0.7 ± 0.1                         | N.D.           | 0.8 ± 0.3      | N.A.  | N.A.                 | N.A.   | N.A.                 |
| AN_287                | AC(14:2)                      | C    | 368.28 | 2.4 ± 0.6                         | N.D.           | 3.9 ± 0.6      | N.A.  | N.A.                 | N.A.   | N.A.                 |
| AN_288                | AC(14:1)                      | C    | 370.29 | 5.8 ± 0.8                         | N.D.           | 9.0 ± 1.8      | N.A.  | N.A.                 | N.A.   | N.A.                 |
| AN_289                | AC(14:0)                      | C    | 372.31 | 5.9 ± 1.2                         | 3.4 ± 2.6      | 10.3 ± 6.9     | 0.6   | 0.24                 | 0.3    | 0.22                 |
| AN_290                | AC(15:0)                      | C    | 386.33 | 1.8 ± 0.6                         | 1.6 ± 0.6      | 2.5 ± 1.0      | 0.9   | 0.68                 | 0.6    | 0.26                 |
| AN_291                | AC(16:2)                      | C    | 396.31 | 3.5 ± 0.8                         | 0.4            | 6.0 ± 1.1      | 0.10  | N.A.                 | 0.06   | N.A.                 |
| AN_292                | AC(16:1)                      | C    | 398.33 | 9.5 ± 0.2                         | 4.5 ± 2.5      | 13.3 ± 9.2     | 0.5   | 0.07                 | 0.3    | 0.23                 |
| AN_293                | AC(16:0)                      | C    | 400.34 | 44.6 ± 11.0                       | 71.9 ± 28.4    | 124.8 ± 36.2   | 1.6   | 0.23                 | 0.6    | 0.12                 |
| AN_294                | AC(17:1)                      | C    | 412.33 | 1.8 ± 0.3                         | 0.6 ± 0.2      | 1.8 ± 0.5      | 0.3   | 7.0E-03              | 0.3    | 0.05                 |
| AN_295                | AC(17:0)                      | C    | 414.36 | 3.3 ± 0.8                         | 6.2 ± 1.9      | 10.0 ± 1.7     | 1.9   | 0.10                 | 0.6    | 0.06                 |
| AN_296                | AC(18:2)                      | C    | 424.34 | 57.9 ± 12.0                       | 25.2 ± 11.7    | 69.3 ± 43.4    | 0.4   | 0.03                 | 0.4    | 0.22                 |
| AN_297                | AC(18:1)                      | C    | 426.36 | 54.4 ± 6.2                        | 64.3 ± 37.4    | 122.1 ± 55.7   | 1.2   | 0.69                 | 0.5    | 0.22                 |
| AN_298                | AC(18:0)                      | C    | 428.37 | 26.8 ± 7.7                        | 78.3 ± 36.9    | 134.2 ± 19.4   | 2.9   | 0.13                 | 0.6    | 0.10                 |
| AN_299                | AC(20:1)                      | C    | 454.39 | 1.9 ± 0.3                         | 4.7 ± 1.8      | 6.1 ± 1.2      | 2.4   | 0.11                 | 0.8    | 0.33                 |
| AN_300                | AC(20:0)                      | C    | 456.40 | 1.2 ± 0.0                         | 4.9 ± 1.1      | 5.2 ± 0.3      | 4.1   | 0.03                 | 0.9    | 0.69                 |
| AN_301                | AC(21:0)                      | C    | 470.42 | 0.3                               | 1.0 ± 0.2      | 1.0 ± 0.0      | 3.7   | N.A.                 | 1.1    | 0.46                 |

Supplementary Material (ESI) for Molecular BioSystems  
This journal is (c) The Royal Society of Chemistry, 2011

|                   |                              |   |        |               |                 |                 |      |   |         |      |           |
|-------------------|------------------------------|---|--------|---------------|-----------------|-----------------|------|---|---------|------|-----------|
| AN_302            | AC(22:0)                     | C | 484.43 | 1.1 ± 0.2     | 3.0 ± 0.5       | 2.7 ± 0.5       | 2.6  | * | 0.011   | 1.1  | 0.57      |
| AN_303            | AC(23:0)                     | C | 498.45 | 0.9 ± 0.1     | 2.0 ± 0.6       | 1.6 ± 0.4       | 2.3  |   | 0.08    | 1.2  | 0.41      |
| <i>Bile acids</i> |                              |   |        |               |                 |                 |      |   |         |      |           |
| AN_304            | Cholesterol                  | C | 369.36 | 557.9 ± 62.5  | 5560.9 ± 1592.4 | 4010.0 ± 2470.8 | 10.0 | * | 0.03    | 1.4  | 0.42      |
| AN_305            | Lithocholic acid             | A | 375.29 | 6.0 ± 3.7     | 3.9 ± 0.5       | 1.7 ± 0.4       | 0.6  |   | 0.39    | 2.3  | * 3.7E-03 |
| AN_306            | Ursodeoxycholic acid         | A | 391.29 | 111.3 ± 51.7  | 32.2 ± 8.0      | 32.2 ± 8.3      | 0.3  | * | 9.7E-04 | 1.0  | 0.99      |
| AN_307            | Chenodeoxycholic acid        | A | 391.29 | 379.5 ± 257.1 | 116.2 ± 41.9    | 50.5 ± 10.9     | 0.3  |   | 0.13    | 2.3  | 0.10      |
| AN_308            | Cholic acid                  | A | 407.28 | 5.6 ± 2.1     | 2.4 ± 0.5       | 1.8 ± 0.6       | 0.4  | * | 0.012   | 1.3  | 0.27      |
| AN_309            | Glycolithocholic acid        | A | 432.32 | 3.0 ± 1.4     | 2.8 ± 2.3       | 1.3 ± 0.4       | 0.9  |   | 0.27    | 2.1  | * 0.02    |
| AN_310            | Glycochenodeoxycholic acid   | A | 448.31 | 17.4 ± 11.9   | 12.3 ± 9.5      | 4.3 ± 2.0       | 0.7  |   | 0.55    | 2.8  | 0.28      |
| AN_311            | Glycodeoxycholic acid        | A | 448.31 | 3.0 ± 1.4     | 2.8 ± 2.3       | 1.3 ± 0.4       | 0.9  |   | 0.88    | 2.1  | 0.39      |
| AN_312            | Glycocholic acid             | A | 464.30 | 2.2 ± 0.6     | 1.9 ± 0.4       | 1.3 ± 0.3       | 0.8  |   | 0.57    | 1.4  | 0.16      |
| AN_313            | Taurochenodeoxycholic acid   | A | 498.30 | 0.9 ± 0.3     | 0.8 ± 0.2       | 0.3 ± 0.1       | 0.8  |   | 0.39    | 2.5  | 0.06      |
| AN_314            | Taurocholic acid             | A | 514.29 | 1.9 ± 0.6     | 1.6 ± 0.4       | 0.8             | 0.8  |   | 0.33    | 2.0  | N.A.      |
| <i>Steroids</i>   |                              |   |        |               |                 |                 |      |   |         |      |           |
| AN_315            | Androsterone                 | C | 308.26 | 1.6 ± 0.4     | 1.8 ± 0.2       | 1.4 ± 0.4       | 1.1  |   | 0.60    | 1.3  | 0.19      |
| AN_316            | Cortisolone                  | C | 347.22 | 6.1 ± 5.1     | 18.0 ± 4.1      | 17.2 ± 12.0     | 3.0  | * | 0.04    | 1.0  | 0.92      |
| AN_317            | 18-Hydroxycorticosterone     | C | 363.22 | 1.1 ± 0.1     | 1.4 ± 0.3       | 0.5 ± 0.0       | 1.3  |   | 0.41    | 2.6  | 0.17      |
| AN_318            | Campesterol                  | C | 383.37 | 24.6 ± 1.5    | 143.5 ± 49.9    | 91.5 ± 72.3     | 5.8  |   | 0.05    | 1.6  | 0.37      |
| AN_319            | 4-Cholestan-3-one            | C | 385.35 | 1.3           | 39.8 ± 7.4      | 23.9 ± 8.5      | 30.4 |   | N.A.    | 1.7  | 0.07      |
| AN_320            | 5 $\alpha$ -Cholestan-3-one  | C | 387.37 | 4.3 ± 0.6     | 49.3 ± 15.9     | 31.1 ± 18.3     | 11.5 | * | 0.04    | 1.6  | 0.27      |
| AN_321            | Dihydrotachysterol           | C | 399.36 | N.D.          | 16.0 ± 4.0      | 15.1 ± 9.5      |      |   | N.A.    | 1.1  | 0.88      |
| AN_322            | Hecogenin                    | C | 431.32 | 3.6 ± 0.4     | 6.1 ± 1.0       | 4.4 ± 0.3       | 1.7  | * | 0.03    | 1.4  | 0.08      |
| AN_323            | $\alpha$ -Tocopherol         | C | 431.39 | 95.0 ± 23.2   | 1212.4 ± 80.5   | 1232.3 ± 125.1  | 12.8 | * | 8.3E-04 | 1.0  | 0.83      |
| AN_324            | $\alpha$ -Tocopherol acetate | C | 490.42 | 0.9 ± 0.0     | 4.5 ± 1.3       | 2.5 ± 0.5       | 5.0  | * | 0.04    | 1.8  | 0.11      |
| <i>Flavonoids</i> |                              |   |        |               |                 |                 |      |   |         |      |           |
| AN_325            | Isoliquiritigenin            | A | 255.07 | 0.4 ± 0.2     | 0.6 ± 0.2       | 0.4 ± 0.1       | 1.3  |   | 0.50    | 1.3  | 0.45      |
| AN_326            | Naringenin                   | A | 271.06 | 0.8 ± 0.2     | 0.9 ± 0.2       | N.D.            | 1.1  |   | 0.69    | N.A. | N.A.      |
| AN_327            | 6-Hydroxyapigenin            | A | 285.04 | 4.4 ± 0.8     | 4.3 ± 0.6       | 3.1 ± 1.0       | 1.0  |   | 0.91    | 1.4  | 0.17      |
| AN_328            | Kaempferol                   | C | 287.05 | 0.8 ± 0.1     | 0.7 ± 0.3       | 1.5 ± 0.5       | 1.0  |   | 0.25    | 0.5  | 0.13      |
| AN_329            | Phyllodulcin                 | C | 287.09 | 1.4 ± 1.3     | 0.8 ± 0.2       | 1.0 ± 0.6       | 0.6  |   | 0.52    | 0.8  | 0.70      |
| AN_330            | Quercetin                    | A | 301.04 | 1.0 ± 0.3     | 1.2 ± 0.2       | 0.6 ± 0.1       | 1.1  |   | 0.40    | 1.8  | * 0.05    |
| <i>Others</i>     |                              |   |        |               |                 |                 |      |   |         |      |           |
| AN_331            | Retinol                      | C | 287.23 | 21.5 ± 3.3    | 17.3 ± 1.1      | 20.2 ± 2.6      | 0.8  |   | 0.15    | 0.9  | 0.19      |
| AN_332            | Ricinoleic acid              | A | 297.24 | 6.5 ± 5.0     | 16.2 ± 0.6      | 9.1 ± 1.9       | 2.5  | * | 1.7E-04 | 1.8  | * 0.015   |
| AN_333            | Sphingosine                  | C | 300.29 | 6.4 ± 0.3     | 4.4 ± 0.5       | 2.6 ± 0.6       | 0.7  | * | 9.6E-03 | 1.7  | * 0.02    |
| AN_334            | Mandelonitrile               | C | 134.06 | 5.7 ± 3.1     | 3.8 ± 0.5       | 3.1 ± 0.1       | 0.7  |   | 0.41    | 1.2  | 0.15      |
| AN_335            | Simvastatin                  | C | 419.28 | N.D.          | N.D.            | 30.3 ± 6.0      | N.A. |   | N.A.    | N.A. | N.A.      |

<sup>1</sup> Peaks were detected in LC-TOF MS measurement for cation mode (C) or anion mode (A).

<sup>2</sup> Raw area values of each sample were normalized (see *Experimental Procedures*), and standard deviations (SDs) were calculated ( $n = 3$ ).

<sup>3</sup>  $p$ -value (Student's  $t$  test)

<sup>4</sup> Detected only from one time in each group.

\*  $p < 0.05$

DL: untreated Watanabe heritable hyperlipidemic rabbits; DLS: simvastatin-treated Watanabe heritable hyperlipidemic rabbits; HC: Japanese white healthy control rabbits

N.D.: Not Detected, N.A.: Not Available
