# Supplementary material for: Metabolomic anatomy of an animal model revealing homeostatic imbalances in dyslipidaemia
Source: Royal Society of Chemistry journal article supplement (doi:10.1039/c0mb00141d), 2011-01-24
Supplement: c0mb00141d-ts3.pdf [file c0mb00141d-ts3.pdf]

| ID           | Annotation                     | <sup>1</sup> RelArea $\pm$ std ( $\times 1000$ ) |        | HC vs. DL |                              |
|--------------|--------------------------------|--------------------------------------------------|--------|-----------|------------------------------|
|              |                                | HC                                               | DL     | DL/HC     | <sup>2</sup> <i>p</i> -value |
| <i>Liver</i> |                                |                                                  |        |           |                              |
| AN_122       | Hypoxanthine                   | 73.9                                             | 42.9   | 0.58      | 3.9E-04                      |
| AN_123       | Inosine                        | 395.3                                            | 220.1  | 0.55      | 4.5E-04                      |
| AN_206       | Spermidine                     | 20.3                                             | 11.9   | 0.58      | 0.004                        |
| AN_086       | <i>N,N</i> -Dimethylglycine    | 11.9                                             | 60.6   | 5.07      | 0.005                        |
| AN_127       | Uric acid                      | 2.4                                              | 28.2   | 11.94     | 0.007                        |
| AN_085       | Glycine betaine                | 259.2                                            | 958.2  | 3.67      | 0.008                        |
| AN_164       | NADH                           | 9.9                                              | 6.7    | 0.67      | 0.011                        |
| AN_109       | Adenosine                      | 19.6                                             | 10.7   | 0.54      | 0.011                        |
| AN_108       | Adenine                        | 19.4                                             | 12.9   | 0.66      | 0.012                        |
| AN_030       | 3-Methylhistidine              | 36.7                                             | 22.7   | 0.61      | 0.020                        |
| AN_082       | CDP-choline                    | 14.1                                             | 10.9   | 0.77      | 0.022                        |
| AN_179       | Glutathione reduced-form (GSH) | 1436.1                                           | 263.3  | 0.18      | 0.023                        |
| AN_087       | Sarcosine                      | 44.6                                             | 81.9   | 1.83      | 0.037                        |
| AN_079       | Glycerophosphocholine          | 4317.1                                           | 3383.0 | 0.78      | 0.046                        |
| <i>Aorta</i> |                                |                                                  |        |           |                              |
| AN_181       | <i>S</i> -Lactoylglutathione   | 2.0                                              | 0.5    | 0.23      | 6.6E-06                      |
| AN_190       | Gly-Gly                        | 0.7                                              | 4.0    | 5.53      | 9.7E-05                      |
| AN_001       | Gly                            | 524.7                                            | 1127.1 | 2.15      | 1.0E-04                      |
| AN_004       | Pro                            | 215.2                                            | 472.4  | 2.20      | 2.5E-04                      |
| AN_006       | Thr                            | 146.5                                            | 349.7  | 2.39      | 3.4E-04                      |
| AN_020       | Trp                            | 24.1                                             | 45.6   | 1.89      | 3.9E-04                      |
| AN_018       | Arg                            | 197.7                                            | 424.1  | 2.15      | 4.3E-04                      |
| AN_013       | Lys                            | 163.4                                            | 423.2  | 2.59      | 4.6E-04                      |
| AN_169       | FAD                            | 2.0                                              | 1.0    | 0.50      | 0.001                        |
| AN_014       | Glu                            | 1261.1                                           | 2239.2 | 1.78      | 0.001                        |
| AN_010       | Asn                            | 64.3                                             | 167.4  | 2.60      | 0.001                        |
| AN_025       | Homoserine                     | 0.5                                              | 3.0    | 5.63      | 0.001                        |
| AN_016       | His                            | 100.2                                            | 232.7  | 2.32      | 0.001                        |
| AN_005       | Val                            | 274.7                                            | 557.7  | 2.03      | 0.001                        |
| AN_008       | Ile                            | 169.5                                            | 367.3  | 2.17      | 0.002                        |
| AN_022       | $\alpha$ -Aminobutyric acid    | 3.7                                              | 14.9   | 4.06      | 0.002                        |
| AN_083       | Choline                        | 997.1                                            | 1590.4 | 1.59      | 0.002                        |
| AN_149       | Gluconic acid                  | 2.3                                              | 8.5    | 3.75      | 0.003                        |
| AN_123       | Inosine                        | 1273.6                                           | 639.7  | 0.50      | 0.003                        |
| AN_026       | Hydroxyproline                 | 7.1                                              | 15.5   | 2.20      | 0.004                        |
| AN_003       | Ser                            | 233.6                                            | 509.4  | 2.18      | 0.004                        |
| AN_074       | Noradrenaline                  | 2.8                                              | 0.4    | 0.16      | 0.004                        |
| AN_209       | Glycolic acid                  | 9.6                                              | 5.2    | 0.54      | 0.004                        |
| AN_079       | Glycerophosphocholine          | 9.2                                              | 335.7  | 36.68     | 0.005                        |

|        |                                 |       |       |      |       |
|--------|---------------------------------|-------|-------|------|-------|
| AN_044 | 5-Oxoproline                    | 8.8   | 15.5  | 1.76 | 0.006 |
| AN_087 | Sarcosine                       | 4.3   | 11.2  | 2.60 | 0.007 |
| AN_134 | Uracil                          | 8.9   | 16.8  | 1.90 | 0.007 |
| AN_118 | GDP                             | 5.4   | 2.3   | 0.42 | 0.008 |
| AN_198 | <i>N</i> -Acetylneuraminic acid | 1.1   | 11.2  | 9.99 | 0.009 |
| AN_116 | Guanosine                       | 270.9 | 128.5 | 0.47 | 0.009 |
| AN_178 | Saccharic acid                  | 0.1   | 0.8   | 5.80 | 0.010 |
| AN_039 | Citrulline                      | 33.7  | 56.7  | 1.68 | 0.010 |
| AN_017 | Phe                             | 126.1 | 234.4 | 1.86 | 0.012 |
| AN_138 | Glucose 1-phosphate             | 28.1  | 14.8  | 0.53 | 0.012 |
| AN_019 | Tyr                             | 121.7 | 206.8 | 1.70 | 0.012 |
| AN_197 | <i>N</i> -Acetylglucosamine     | 1.0   | 6.7   | 6.35 | 0.013 |
| AN_067 | Carnitine                       | 88.9  | 145.8 | 1.64 | 0.013 |
| AN_002 | Ala                             | 447.8 | 661.0 | 1.48 | 0.014 |
| AN_218 | 2-Hydroxypentanoic acid         | 0.9   | 1.6   | 1.71 | 0.016 |
| AN_129 | Cytidine                        | 68.2  | 41.3  | 0.61 | 0.017 |
| AN_207 | Spermine                        | 0.5   | 0.2   | 0.29 | 0.019 |
| AN_043 | $\gamma$ -Aminobutyric acid     | 4.2   | 6.9   | 1.66 | 0.019 |
| AN_143 | 3-Phosphoglyceric acid          | 106.1 | 46.0  | 0.43 | 0.019 |
| AN_179 | Glutathione reduced-form (GSH)  | 321.8 | 54.4  | 0.17 | 0.020 |
| AN_021 | $\beta$ -Ala                    | 15.2  | 37.1  | 2.44 | 0.020 |
| AN_085 | Glycine betaine                 | 115.1 | 446.3 | 3.88 | 0.021 |
| AN_143 | 3-Phosphoglyceric acid          | 106.1 | 46.0  | 0.43 | 0.021 |
| AN_075 | Homovanillic acid               | 0.3   | 0.5   | 1.82 | 0.021 |
| AN_088 | <i>S</i> -Adenosylhomocysteine  | 3.9   | 5.0   | 1.26 | 0.023 |
| AN_156 | Isocitric acid                  | 1.7   | 3.7   | 2.22 | 0.025 |
| AN_195 | Ribulose 1,5-diphosphate        | 0.8   | 0.3   | 0.33 | 0.025 |
| AN_206 | Spermidine                      | 9.1   | 4.2   | 0.46 | 0.028 |
| AN_141 | Fructose 1,6-diphosphate        | 69.0  | 25.1  | 0.36 | 0.029 |
| AN_210 | Trimethylamine <i>N</i> -oxide  | 2.4   | 6.0   | 2.52 | 0.030 |
| AN_009 | Leu                             | 476.0 | 789.2 | 1.66 | 0.035 |
| AN_142 | Dihydroxyacetone phosphate      | 27.5  | 10.7  | 0.39 | 0.039 |
| AN_122 | Hypoxanthine                    | 170.9 | 272.5 | 1.59 | 0.041 |
| AN_064 | Pipecolic acid                  | 5.1   | 20.2  | 3.94 | 0.041 |
| AN_226 | Citramalic acid                 | 1.1   | 1.7   | 1.49 | 0.041 |
| AN_057 | 5-Methylthioadenosine           | 0.4   | 0.6   | 1.51 | 0.041 |
| AN_062 | Imidazole-4-acetic acid         | 0.9   | 0.4   | 0.46 | 0.046 |
| AN_184 | Ophthalmic acid                 | 5.1   | 10.4  | 2.03 | 0.048 |
| AN_131 | CMP                             | 0.7   | 0.6   | 0.80 | 0.049 |

---

*Cardiac muscle*

|        |                             |      |      |      |       |
|--------|-----------------------------|------|------|------|-------|
| AN_027 | <i>O</i> -Acetylserine      | 17.5 | 37.6 | 2.19 | 0.001 |
| AN_086 | <i>N,N</i> -Dimethylglycine | 1.7  | 5.5  | 3.24 | 0.001 |

|               |                                                                                        |        |        |      |       |
|---------------|----------------------------------------------------------------------------------------|--------|--------|------|-------|
| AN_073        | Tyramine                                                                               | 1.0    | 1.3    | 1.22 | 0.002 |
| AN_035        | <i>N</i> <sub>6</sub> , <i>N</i> <sub>6</sub> , <i>N</i> <sub>6</sub> -Trimethyllysine | 20.1   | 13.4   | 0.68 | 0.002 |
| AN_114        | Adenylosuccinic acid                                                                   | 33.5   | 65.1   | 1.97 | 0.005 |
| AN_077        | Kynurenine                                                                             | 7.5    | 10.5   | 1.43 | 0.007 |
| AN_182        | Carnosine                                                                              | 860.0  | 1308.6 | 1.54 | 0.010 |
| AN_145        | Phosphoenolpyruvic acid                                                                | 2.3    | 1.2    | 0.53 | 0.017 |
| AN_080        | Phosphorylcholine                                                                      | 380.1  | 500.0  | 1.34 | 0.023 |
| AN_030        | 3-Methylhistidine                                                                      | 98.9   | 62.8   | 0.64 | 0.025 |
| AN_039        | Citrulline                                                                             | 123.0  | 45.5   | 0.38 | 0.026 |
| AN_190        | Gly-Gly                                                                                | 7.3    | 5.4    | 0.75 | 0.026 |
| AN_056        | Isethionic acid                                                                        | 4.4    | 2.5    | 0.58 | 0.033 |
| AN_036        | Cystathionine                                                                          | 7.1    | 9.3    | 1.33 | 0.033 |
| AN_143        | 3-Phosphoglyceric acid                                                                 | 3.4    | 2.1    | 0.63 | 0.040 |
| AN_085        | Glycine betaine                                                                        | 994.9  | 2785.6 | 2.83 | 0.045 |
| AN_200        | Creatinine                                                                             | 799.6  | 1135.2 | 1.44 | 0.046 |
| AN_139        | Glucose 6-phosphate                                                                    | 3140.4 | 1994.0 | 0.64 | 0.049 |
| <i>Plasma</i> |                                                                                        |        |        |      |       |
| AN_040        | Argininosuccinic acid                                                                  | 2.2    | 1.3    | 0.61 | 0.044 |
| <i>Brain</i>  |                                                                                        |        |        |      |       |
| AN_089        | <i>S</i> -adenosylmethionine                                                           | 15.6   | 19.8   | 1.23 | 0.004 |
| AN_067        | Carnitine                                                                              | 79.6   | 110.5  | 1.35 | 0.009 |
| AN_183        | Homocarnosine                                                                          | 304.0  | 139.0  | 0.44 | 0.010 |
| AN_039        | Citrulline                                                                             | 143.1  | 84.4   | 0.57 | 0.010 |
| AN_031        | <i>N</i> <sub>5</sub> -Ethylglutamine                                                  | 7.0    | 3.9    | 0.55 | 0.012 |
| AN_215        | $\alpha$ -Hydroxybutyric acid                                                          | 17.8   | 24.6   | 1.33 | 0.025 |
| AN_035        | <i>N</i> <sub>6</sub> , <i>N</i> <sub>6</sub> , <i>N</i> <sub>6</sub> -Trimethyllysine | 5.6    | 6.9    | 1.21 | 0.036 |

<sup>1</sup> Raw area values of each sample were normalized and averages in each group were calculated (*n* = 3)

<sup>2</sup> *p*-value (Student's *t* test)
