# Supplementary material for: Metabolomic anatomy of an animal model revealing homeostatic imbalances in dyslipidaemia
Source: Royal Society of Chemistry journal article supplement (doi:10.1039/c0mb00141d), 2011-01-24
Supplement: c0mb00141d-ts4.pdf [file c0mb00141d-ts4.pdf]

| ID                    | Annotation                              | <sup>1</sup> RelArea $\pm$ std ( $\times 1000$ ) |       | DL vs. DLS |                              |
|-----------------------|-----------------------------------------|--------------------------------------------------|-------|------------|------------------------------|
|                       |                                         | DL                                               | DLS   | DL/DLS     | <sup>2</sup> <i>p</i> -value |
| <i>Liver</i>          |                                         |                                                  |       |            |                              |
| AN_184                | Ophthalmic acid                         | 20.4                                             | 10.3  | 2.01       | 0.009                        |
| AN_164                | NADH                                    | 6.7                                              | 4.2   | 1.60       | 0.033                        |
| AN_084                | Betaine aldehyde                        | 6.3                                              | 11.9  | 0.54       | 0.038                        |
| AN_127                | Uric acid                               | 28.2                                             | 7.1   | 3.98       | 0.041                        |
| AN_085                | Glycine betaine                         | 958.2                                            | 466.7 | 2.09       | 0.041                        |
| AN_020                | Trp                                     | 31.9                                             | 25.2  | 1.29       | 0.045                        |
| AN_086                | <i>N,N</i> -Dimethylglycine             | 60.6                                             | 29.3  | 2.10       | 0.048                        |
| <i>Aorta</i>          |                                         |                                                  |       |            |                              |
| AN_030                | 3-Methylhistidine                       | 22.2                                             | 40.9  | 0.54       | 0.014                        |
| AN_170                | Pantothenic acid                        | 1.3                                              | 2.0   | 0.64       | 0.015                        |
| AN_080                | Phosphorylcholine                       | 142.0                                            | 164.7 | 0.86       | 0.018                        |
| AN_164                | NADH                                    | 0.6                                              | 1.3   | 0.44       | 0.021                        |
| AN_006                | Thr                                     | 349.7                                            | 289.1 | 1.21       | 0.022                        |
| AN_135                | Uridine                                 | 57.3                                             | 76.0  | 0.75       | 0.027                        |
| AN_106                | 10-Hydroxydecanoic acid                 | 0.5                                              | 0.4   | 1.34       | 0.033                        |
| AN_151                | Ribose 5-phosphate                      | 4.3                                              | 7.1   | 0.61       | 0.034                        |
| AN_018                | Arg                                     | 424.1                                            | 348.1 | 1.22       | 0.037                        |
| AN_004                | Pro                                     | 472.4                                            | 400.2 | 1.18       | 0.045                        |
| AN_131                | CMP                                     | 0.6                                              | 0.8   | 0.73       | 0.046                        |
| AN_015                | Met                                     | 154.6                                            | 106.6 | 1.45       | 0.047                        |
| AN_069                | Hippuric acid                           | 2.1                                              | 0.8   | 2.50       | 0.049                        |
| <i>Cardiac muscle</i> |                                         |                                                  |       |            |                              |
| AN_030                | 3-Methylhistidine                       | 62.8                                             | 116.8 | 0.54       | 9.27E-04                     |
| AN_216                | $\beta$ -Hydroxybutyric acid            | 267.5                                            | 216.7 | 1.23       | 1.29E-03                     |
| AN_077                | Kynurenine                              | 10.5                                             | 6.9   | 1.51       | 0.003                        |
| AN_206                | Spermidine                              | 49.5                                             | 28.2  | 1.76       | 0.003                        |
| AN_076                | Anthranilic acid                        | 1.7                                              | 3.4   | 0.51       | 0.003                        |
| AN_207                | Spermine                                | 5.5                                              | 2.6   | 2.13       | 0.005                        |
| AN_101                | Hexanoic acid                           | 2.2                                              | 3.6   | 0.62       | 0.006                        |
| AN_036                | Cystathionine                           | 9.3                                              | 6.5   | 1.43       | 0.011                        |
| AN_144                | 2,3-Diphosphoglyceric acid              | 4.5                                              | 1.3   | 3.59       | 0.016                        |
| AN_086                | <i>N,N</i> -Dimethylglycine             | 5.5                                              | 3.0   | 1.84       | 0.020                        |
| AN_078                | Serotonin                               | 0.6                                              | 0.5   | 1.31       | 0.024                        |
| AN_204                | <i>N</i> <sub>8</sub> -Acetylspermidine | 0.5                                              | 0.4   | 1.41       | 0.028                        |
| AN_022                | $\alpha$ -Aminobutyric acid             | 6.5                                              | 4.5   | 1.44       | 0.028                        |
| AN_129                | Cytidine                                | 54.8                                             | 42.6  | 1.29       | 0.030                        |
| AN_205                | Putrescine                              | 8.9                                              | 5.8   | 1.55       | 0.032                        |
| AN_208                | Isobutylamine                           | 4.8                                              | 3.4   | 1.41       | 0.034                        |
| AN_018                | Arg                                     | 583.4                                            | 461.5 | 1.27       | 0.036                        |

|               |                                         |        |        |      |          |
|---------------|-----------------------------------------|--------|--------|------|----------|
| AN_139        | Glucose 6-phosphate                     | 1994.0 | 643.9  | 3.09 | 0.038    |
| AN_137        | dTDP                                    | 0.5    | 0.4    | 1.34 | 0.038    |
| AN_069        | Hippuric acid                           | 1.5    | 0.7    | 2.27 | 0.038    |
| AN_135        | Uridine                                 | 16.2   | 10.9   | 1.49 | 0.040    |
| <i>Plasma</i> |                                         |        |        |      |          |
| AN_044        | 5-Oxoproline                            | 41.2   | 28.7   | 1.44 | 1.37E-03 |
| AN_013        | Lys                                     | 876.2  | 626.6  | 1.40 | 0.003    |
| AN_014        | Glu                                     | 150.5  | 87.1   | 1.73 | 0.007    |
| AN_012        | Gln                                     | 2354.4 | 2027.8 | 1.16 | 0.009    |
| AN_220        | 4-Acetylbutyric acid                    | 9.2    | 11.8   | 0.78 | 0.009    |
| AN_019        | Tyr                                     | 383.5  | 280.5  | 1.37 | 0.014    |
| AN_221        | 6-Hydroxyhexanoic acid                  | 5.7    | 7.2    | 0.79 | 0.017    |
| AN_101        | Hexanoic acid                           | 20.5   | 28.0   | 0.73 | 0.019    |
| AN_006        | Thr                                     | 680.8  | 469.8  | 1.45 | 0.019    |
| AN_018        | Arg                                     | 955.5  | 662.3  | 1.44 | 0.022    |
| AN_010        | Asn                                     | 186.2  | 149.5  | 1.25 | 0.023    |
| AN_135        | Uridine                                 | 10.8   | 16.6   | 0.65 | 0.027    |
| AN_216        | $\beta$ -Hydroxybutyric acid            | 415.1  | 397.3  | 0.78 | 0.028    |
| AN_102        | Heptanoic acid                          | 13.3   | 15.5   | 0.86 | 0.033    |
| AN_122        | Hypoxanthine                            | 17.4   | 8.5    | 2.06 | 0.035    |
| AN_070        | 3-Phenylpropionic acid                  | 21.2   | 13.2   | 1.60 | 0.036    |
| AN_052        | Cysteine sulphinic acid                 | 0.6    | 0.5    | 1.17 | 0.041    |
| AN_143        | 3-Phosphoglyceric acid                  | 3.7    | 2.5    | 1.51 | 0.042    |
| <i>Brain</i>  |                                         |        |        |      |          |
| AN_030        | 3-Methylhistidine                       | 49.6   | 94.1   | 0.54 | 0.013    |
| AN_204        | <i>N</i> <sub>8</sub> -Acetylspermidine | 0.3    | 0.2    | 1.95 | 0.018    |
| AN_019        | Tyr                                     | 151.7  | 119.4  | 1.30 | 0.024    |
| AN_203        | Hexylamine                              | 80.1   | 53.8   | 1.52 | 0.031    |
| AN_089        | <i>S</i> -adenosylmethionine            | 19.8   | 18.4   | 1.10 | 0.034    |
| AN_088        | <i>S</i> -Adenosylhomocysteine          | 5.6    | 4.4    | 1.29 | 0.039    |
| AN_043        | $\gamma$ -Aminobutyric acid             | 4383.8 | 3704.0 | 1.20 | 0.045    |

<sup>1</sup> Raw area values of each sample were normalized and averages in each group were calculated ( $n = 3$ ).

<sup>2</sup>  $p$ -value (Student's  $t$  test)
