# Supplementary material for: Metabolomic anatomy of an animal model revealing homeostatic imbalances in dyslipidaemia
Source: Royal Society of Chemistry journal article supplement (doi:10.1039/c0mb00141d), 2011-01-24
Supplement: c0mb00141d-ts5.pdf [file c0mb00141d-ts5.pdf]

| Compound name         | RSD (%) for Rel. Area ( $n = 5$ ) |                      | Linearity Correlation | Detection Limit Conc. ( $\mu\text{M}$ ) | Note                 |
|-----------------------|-----------------------------------|----------------------|-----------------------|-----------------------------------------|----------------------|
|                       | 2 [ $\mu\text{M}$ ]               | 20 [ $\mu\text{M}$ ] |                       |                                         |                      |
| <i>Negative mode</i>  |                                   |                      |                       |                                         |                      |
| Palmitic acid         | 3.7                               | 3.2                  | 0.937                 | 0.006                                   | Fatty acid (16:0)    |
| Stearic acid          | 4.5                               | 7.8                  | 0.982                 | 0.010                                   | Fatty acid (18:0)    |
| Linoleic acid         | 7.2                               | 2.9                  | 0.985                 | 0.002                                   | Fatty acid (18:2)    |
| Oleic acid            | 8.3                               | 4.5                  | 0.970                 | 0.003                                   | Fatty acid (18:1)    |
| Arachidonic acid      | 3.8                               | 1.8                  | 0.974                 | 0.007                                   | Fatty acid (20:4)    |
| Cholic acid           | 2.2                               | 3.1                  | 0.996                 | 0.015                                   | Bile acid            |
| Glycocholic acid      | 3.2                               | 4.4                  | 0.997                 | 0.009                                   | Bile acid            |
| Chenodeoxycholic acid | 2.2                               | 1.1                  | 0.996                 | 0.008                                   | Bile acid            |
| <i>Positive mode</i>  |                                   |                      |                       |                                         |                      |
| Palmitoyl carnitine   | 2.1                               | 9.0                  | 0.997                 | 0.425                                   | Acylcarnitine (16:0) |
| Cortisol              | 1.8                               | 3.4                  | 0.990                 | 0.140                                   | Steroid              |
| $\alpha$ -Tocopherol  | 2.7                               | 3.7                  | 0.993                 | 0.011                                   |                      |
| Riboflavin            | 5.4                               | 2.8                  | 0.986                 | 0.004                                   |                      |
| Biotin                | 2.7                               | 2.6                  | 0.996                 | 0.047                                   |                      |
| Thyroxine             | 2.3                               | 2.3                  | 0.991                 | 0.010                                   |                      |
| Sphinganine           | 2.1                               | 2.3                  | 0.982                 | 0.258                                   |                      |
